# Impact of *Schistosoma mansoni* on Malaria Transmission in Sub-Saharan Africa

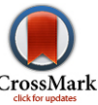

Martial L. Ndeffo Mbah<sup>1\*</sup>, Laura Skrip<sup>1</sup>, Scott Greenhalgh<sup>1</sup>, Peter Hotez<sup>2</sup>, Alison P. Galvani<sup>1</sup>

**1** School of Public Health, Yale University, New Haven, Connecticut, United States of America, **2** National School of Tropical Medicine, and Sabin Vaccine Institute and Texas Children's Hospital Center for Vaccine Development, Baylor College of Medicine, Houston, Texas, United States of America

## Abstract

**Background:** Sub-Saharan Africa harbors the majority of the global burden of malaria and schistosomiasis infections. The co-endemicity of these two tropical diseases has prompted investigation into the mechanisms of coinfection, particularly the competing immunological responses associated with each disease. Epidemiological studies have shown that infection with *Schistosoma mansoni* is associated with a greater malaria incidence among school-age children.

**Methodology:** We developed a co-epidemic model of malaria and *S. mansoni* transmission dynamics which takes into account key epidemiological interaction between the two diseases in terms of elevated malaria incidence among individuals with *S. mansoni* high egg output. The model was parameterized for *S. mansoni* high-risk endemic communities, using epidemiological and clinical data of the interaction between *S. mansoni* and malaria among children in sub-Saharan Africa. We evaluated the potential impact of the *S. mansoni*-malaria interaction and mass treatment of schistosomiasis on malaria prevalence in co-endemic communities.

**Principal Findings:** Our results suggest that in the absence of mass drug administration of praziquantel, the interaction between *S. mansoni* and malaria may reduce the effectiveness of malaria treatment for curtailing malaria transmission, in *S. mansoni* high-risk endemic communities. However, when malaria treatment is used in combination with praziquantel, mass praziquantel administration may increase the effectiveness of malaria control intervention strategy for reducing malaria prevalence in malaria- *S. mansoni* co-endemic communities.

**Conclusions/Significance:** Schistosomiasis treatment and control programmes in regions where *S. mansoni* and malaria are highly prevalent may have indirect benefits on reducing malaria transmission as a result of disease interactions. In particular, mass praziquantel administration may not only have the direct benefit of reducing schistosomiasis infection, it may also reduce malaria transmission and disease burden.

**Citation:** Ndeffo Mbah ML, Skrip L, Greenhalgh S, Hotez P, Galvani AP (2014) Impact of *Schistosoma mansoni* on Malaria Transmission in Sub-Saharan Africa. PLoS Negl Trop Dis 8(10): e3234. doi:10.1371/journal.pntd.0003234

**Editor:** Judd L. Walson, University of Washington, United States of America

**Received:** January 7, 2014; **Accepted:** September 2, 2014; **Published:** October 16, 2014

**Copyright:** © 2014 Ndeffo Mbah et al. This is an open-access article distributed under the terms of the Creative Commons Attribution License, which permits unrestricted use, distribution, and reproduction in any medium, provided the original author and source are credited.

**Funding:** This work was funded by the Notsew Orm Sands Foundation. The funders had no role in study design, data collection and analysis, decision to publish, or preparation of the manuscript.

**Competing Interests:** The authors have declared that no competing interests exist.

\* Email: Martial.Ndeffo-Mbah@yale.edu

## Introduction

Malaria is highly endemic throughout sub-Saharan Africa in which 85% of global malaria cases and 90% of malaria deaths occur [1]. *Schistosoma mansoni* (the causative agent of intestinal schistosomiasis) is likewise prevalent in many sub-Saharan African countries [2,3], accounting for approximately one-third of the total cases of schistosomiasis in the region [4]. Both malaria and intestinal schistosomiasis share similar epidemiological distributions and present challenges to public health and socio-economic development throughout these regions [5]. Due to their coendemicity, there has been increased investigation into the interactive pathology between malaria and *S. mansoni* [6–9].

Heavy *S. mansoni* infections have been found to be associated with a significant increase in the incidence of malaria among school-age children [6]. While the mechanism responsible for the exacerbation of malaria in individuals infected with *S. mansoni* is not yet fully understood [7,9], the interactions between the two

diseases are possibly driven by countering effects the parasites have on immunological cytokines [10,11]; that is, *S. mansoni* may alter the balance between Th1 and Th2 type immune responses [12–14] which reduces immunological control of malaria, although other mechanisms are possible.

Artemisinin-based combination therapies (ACT) are increasingly used as first-line treatment against malaria in sub-Saharan Africa [15,16]. ACT is an efficacious drug regimen that reduces the risk of malaria-induced morbidity and mortality as well as malaria transmission from humans to vectors [17,18]. For the control of schistosomiasis, current World Health Organization (WHO) guidelines recommend frequent mass administration of praziquantel, a highly effective and relatively inexpensive anti-schistosomal agent [19], to school-age children or to entire communities depending on schistosomiasis prevalence and available resources [20]. However, the adoption of mass praziquantel administration remains suboptimal in sub-Saharan Africa mainly due to limited drug availability, even as the schistosomiasis disease

## Author Summary

Malaria and *Schistosoma mansoni* are co-endemic in many regions of sub-Saharan Africa. Evidence from clinical and epidemiological studies support the hypothesis that concurrent infection with *S. mansoni* is associated with greater malaria incidence among school-age children. We use mathematical modeling to evaluate the epidemiological impact of *S. mansoni* infection on malaria transmission in sub-Saharan Africa. Using epidemiological data on the increased risk of malaria incidence in *S. mansoni* endemic communities from Senegal, we developed a co-epidemic model of malaria and *S. mansoni* transmission dynamics to address key epidemiological interactions between the two diseases. Parameterizing our model for *S. mansoni* high-risk endemic communities, we show that the interaction between *S. mansoni* and malaria may reduce the effectiveness of malaria treatment for curtailing malaria transmission. Moreover, we show that in addition to reducing schistosomiasis health burden, mass praziquantel administration will generate indirect benefit in terms of reducing malaria transmission and disease burden in *S. mansoni*-malaria co-endemic communities. Our findings indicate the possible benefit of scaling up schistosomiasis control efforts in sub-Saharan Africa, and especially in areas where *S. mansoni* and malaria are highly prevalent.

burden continues to rise [21]. Mass praziquantel treatment coverage and compliance may vary substantially from one schistosomiasis endemic area to another.

We evaluated how *S. mansoni* infection and mass praziquantel administration may affect the dynamics and control of malaria in co-endemic communities. In the absence of field studies that directly measure the effect of schistosomiasis control on malaria transmission and progression [6,22–25], we address this question by using epidemiological and clinical findings that estimate the elevation in relative risk of malaria attributable to *S. mansoni* infection [6] to develop a mathematical model of the joint dynamics of malaria and *S. mansoni* among children. We use this model to evaluate the inter-dependent impact of *S. mansoni* on malaria infection and the potential impact of schistosomiasis and malaria treatment for reducing malaria transmission.

## Methods

To quantify the potential impact of *S. mansoni* infection and mass praziquantel administration on malaria transmission, we developed a compartmental deterministic model for co-endemic communities in sub-Saharan Africa. Specifically, our model describes the joint dynamics of malaria and *S. mansoni* transmission among children younger than 15 years old. This age group is the most at risk for both malaria and schistosomiasis transmission in sub-Saharan Africa [22].

## Model

We developed a mathematical model of the interplay between malaria and *S. mansoni*. Malaria transmission was modeled as follows [26]: At each point in time people can be in one of six infectious states – susceptible (*S*), treated symptomatic disease (*T*), untreated symptomatic disease (*D*), asymptomatic patent infection (*A*), asymptomatic sub-patent infection (*U*) and protected by a period of prophylaxis from treatment (*P*). We assumed that individuals entered the model susceptible and become infected at a rate determined by the force of infection in the population given by  $\Lambda_M = (amI_M)b$ , where *a* represents the biting rate on humans

by a female mosquito, *m* is the density of mosquitoes per human, *b* is the probability of successful human inoculation upon an infectious bite, and *I<sub>M</sub>* the proportion of infectious mosquitoes in the vector population. Upon infection, individuals either develop symptomatic disease (with a probability  $\Phi$ ) or develop patent asymptomatic infection ( $I - \Phi$ ). Those who develop symptomatic disease have a fixed probability (*f<sub>T</sub>*) of being treated successfully with an ACT (*T*), in which case they clear infection at a rate *r<sub>T</sub>* and enter a period of prophylactic protection (*P*) before returning (*r<sub>P</sub>*) to being susceptible to new infection. Those who fail treatment ( $I - f_T$ ) are assumed to eventually clear disease (*D*) and become patently asymptomatic (*A*) at rate *r<sub>D</sub>*. From patent asymptomatic infection, individuals will move to a sub-patent stage (*U*) at a rate *r<sub>A</sub>* and then clear infection at rate *r<sub>U</sub>* and individuals return to being susceptible. The force of infection of malaria on the mosquito population,  $\Lambda_M^V$ , was given by the product of host biting rate per mosquito, probability of mosquito infection upon biting an infectious human (*C<sub>D</sub>*, *C<sub>U</sub>*, *C<sub>A</sub>*), and the proportion of infected individuals at each infectious stage (*D*, *A*, *U*). The intensity of malaria transmission is represented as the annual entomological inoculation rate (AEIR), defined as the product of the human biting rate of mosquitoes and the proportion of mosquitoes that are infectious. AEIR is measured in the number of infective bites per person per year (ibpy). Here malaria prevalence refers to any level of parasitaemia rather than symptomatic disease alone.

For *S. mansoni* transmission, we assumed that at each point in time people can be in one of three states – susceptible (*S*), infected with low egg output (*I<sub>L</sub>*), and infected with high egg output (*I<sub>H</sub>*) [27]. Likelihood of schistosomiasis transmission from humans to snails depends on worm burden and mean egg production per worm. For the sake of simplicity, egg production was not explicitly modeled. However consistent with previous schistosomiasis modeling studies, we used transmission rates that implicitly account for egg production rate per worm, contact with infested waters, and probability of worm establishment per contact [27,28]. We assumed that individuals entered the model susceptible and become infected with an initially low egg output at a transmission rate  $\beta_L$ . Individuals with low egg output may then transition to high egg output at a transmission rate  $\beta_H = \omega_H \beta_L$ , where  $\omega_H$  determines the rate of transition to a high egg output from a low egg output relative to  $\beta_L$ . We assumed the individuals infected with low egg output infect susceptible snails at a transmission rate  $\beta_S$ , and individuals with high egg output infect snails at a transmission rate  $\omega_H \beta_S$ , where  $\omega_H$  is the relative increase of transmission rate to snails for high egg output individuals relative to low egg output individuals. Because rates of schistosomiasis reinfection are very high in endemic areas, we assumed that there is no natural recovery for *S. mansoni* infected individuals, and that without treatment infected individuals with a high egg output will not transition to a low egg output. We incorporated annual praziquantel treatment into the model by assuming that treatment has an efficacy of 70% [29,30]. We assumed that upon treatment, 70% of individuals with low egg output will recover from infection, and 70% of individuals with high egg output will either recover from infection or have their egg output reduced to a low level, such that 40% of treated high egg output will recover from infection, while 30% will have their egg output reduced to a low level [29,30]. We evaluated the potential impact of deworming through mass drug administration with praziquantel on malaria prevalence by considering different levels of treatment coverage ranging from 30–80%.

Individuals can be infected with malaria only, *S. mansoni* only, or dually infected with malaria and *S. mansoni*. The model

**Table 1.** Parameter definitions of our *Schistosoma mansoni*-malaria co-infection model.

| Parameter   | Definition                                                                                   | Value (95%CI)                     | Ref        |
|-------------|----------------------------------------------------------------------------------------------|-----------------------------------|------------|
| $\mu_d$     | Natural death rate of host                                                                   | 0.05 yr <sup>-1</sup>             | —          |
| $a$         | Biting rate on humans by a female mosquito                                                   | 0.67 Day <sup>-1</sup>            | [71]       |
| $b$         | Probability of successful human inoculation upon an infectious bite                          | 0.25                              | [38]       |
| $m$         | Density of mosquitoes per human                                                              | varied <sup>†</sup>               | —          |
| $\phi$      | Probability of becoming symptomatic case upon infection (susceptibility)                     | 0.72                              | [72]       |
| $r_D^{-1}$  | Duration of symptomatic malaria                                                              | 5 Days                            | [73]       |
| $r_A^{-1}$  | Duration of asymptomatic malaria                                                             | 180 Days                          | [26]       |
| $r_U^{-1}$  | Duration of sub-patent malaria                                                               | 180 Days                          | [74]       |
| $r_T^{-1}$  | Duration of clinical malaria upon chemotherapy                                               | 5 Days                            | [75]       |
| $r_P^{-1}$  | Duration of prophylaxis from malaria treatment                                               | 20 Days                           | [75,76]    |
| $f_T$       | Proportion of symptomatic malaria cases treated effectively                                  | 0.5 (0–0.9)                       | [77,78]    |
| $\mu_M$     | Mosquito natural mortality rate                                                              | 1/8 Day <sup>-1</sup>             | [26]       |
| $t_{incub}$ | Mosquito incubation period                                                                   | 10 Days                           | [26]       |
| $C_D$       | Probability of mosquito infection upon biting a human in state untreated clinical disease    | 0.3                               | [79]       |
| $C_A$       | Probability of mosquito infection upon biting a human in state Asymptomatic patent infection | 0.1                               | [79]       |
| $C_U$       | Probability of mosquito infection upon biting a human in state sub-patent infection          | 0.05                              | [79]       |
| $C_M$       | Enhancement of malaria susceptibility due to high worm burden                                | 1.85 (1.16–2.74)                  | [6]        |
| $\beta_S$   | Human low worm burden to snails transmission                                                 | 0.02 (0.01–1.88) yr <sup>-1</sup> | estimated* |
| $\beta_L$   | Snail to human transmission from no infection to low worm burden                             | 7.08 (0.2–9.84) yr <sup>-1</sup>  | estimated* |
| $i_H$       | Human high worm burden to snails transmission relative to $\beta_S$                          | 1.91 (1.0–18.3)                   | estimated* |
| $\omega_H$  | Snail to human transmission from low to high worm burden relative to $\beta_L$               | 0.77 (0.04–0.97)                  | estimated* |
| $\delta_S$  | Snail natural mortality rate                                                                 | 0.17 yr <sup>-1</sup>             | [80]       |
| $C_T$       | Mass praziquantel treatment coverage                                                         | 30–80%                            | —          |

\*Parameters were estimated using a Bayesian Melding procedure [81,82] to fit the *S. mansoni* dynamic model to prevalence data for high-risk endemic communities. In high-risk communities, the overall *S. mansoni* prevalence was varied from 40–80% and the high worm burden prevalence was varied from 15–60% [6,17,83,84]. High worm burden was defined as having a *S. mansoni* load exceeding 1000 eggs/g of stool [6].

<sup>†</sup>Density of mosquitoes per human was varied so as to account for different value of the annual entomological inoculation rate.

doi:10.1371/journal.pntd.0003234.t001

captures the epidemiological interaction between the two diseases in terms of *S. mansoni* enhancing susceptibility to malaria denoted as  $C_M$  and parameterized from epidemiological field data [6] (Table 1). We focused on communities in which malaria and *S. mansoni* are co-endemic, and considered variation in malaria transmission intensity by varying the AEIR from 1 ibpy to 500 ibpy [31]. We present results obtained at endemic equilibrium. A detailed description of the model is given in the Supplement Material and an overview of parameters and values used to generate the model outcomes are given in Table 1.

## Results

By comparing malaria prevalence in the presence and absence of *S. mansoni* co-endemicity, we showed that the impact of schistosomiasis co-infection on increasing malaria prevalence was higher in areas of low malaria transmission than areas of high malaria transmission (Figures 1 & S1). For example, disease interaction was shown to increase malaria prevalence by 3.0–4.5% for an AEIR of 10 ibpy and by 0.6–1.5% for an AEIR of 100 ibpy, depending on malaria treatment coverage, ranging from 30–90% (Figure 1). The effect of *S. mansoni* co-infection on malaria prevalence plateaued from 100 ibpy upwards (Figure 1).

We also found that the interaction between malaria and *S. mansoni* may reduce the effectiveness of malaria treatment for decreasing malaria prevalence (Figure 2). For an AEIR of 100 ibpy, *S. mansoni* co-infection was shown to decrease the proportional reduction of malaria prevalence due to treatment by 1.3% for 90% treatment coverage, 1% for 60% treatment coverage, and 0.5% for 30% treatment coverage (Figure 2A). For 90% malaria treatment coverage, *S. mansoni* co-infection increases symptomatic malaria episodes by 29 episodes per 100 people annually, by 45 episodes per 100 people annually for 60% treatment coverage, and 93 episodes per 100 people annually for 30% treatment coverage (Figure 2B).

For an AEIR of 10 ibpy, disease interaction was shown to decrease the proportional reduction of malaria prevalence due to treatment by 2.5% for 90% treatment coverage, 1.4% for 60% treatment coverage, and by 0.6% for 30% treatment coverage (Figure 2A). For 90% malaria treatment coverage *S. mansoni* co-infection increases symptomatic malaria episodes by 11 episodes per 100 people annually, by 16 episodes per 100 people annually for 60% treatment coverage, and 21 episodes per 100 people annually for 30% treatment coverage (Figure 2B).

When ACT is used in combination with annual mass praziquantel administration, we showed that the intervention

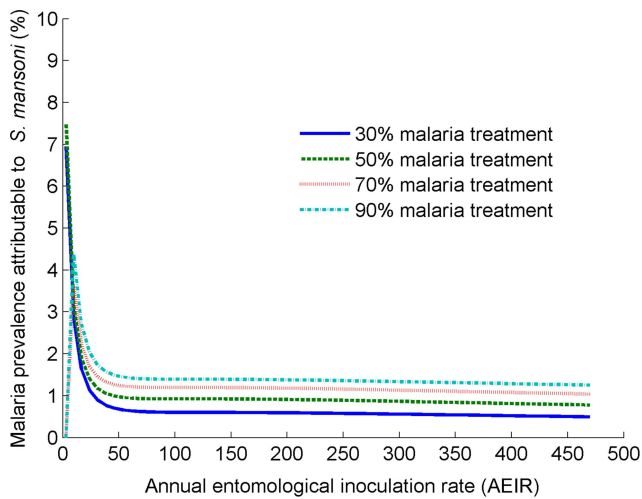

**Figure 1. Malaria prevalence attributable to *S. mansoni* in a range of malaria transmission settings.** The prevalence attributable to *S. mansoni* is the difference between the equilibrium malaria prevalence in the presence of interaction and that in the absence of interaction between *S. mansoni* and malaria. *S. mansoni* high worm burden was assumed to increase the risk of malaria infection by 85% ( $C_M = 1.85$ ), consistent with epidemiological studies [6]. doi:10.1371/journal.pntd.0003234.g001

was more effective in reducing malaria prevalence and that this effectiveness increases both with the coverage of praziquantel and with the increased susceptibility to malaria infection due to *S. mansoni* (Figure 3). This increase in effectiveness was more pronounced in areas of low malaria transmission intensity (Figure 3A) than in areas of high transmission intensity (Figure 3B). The interaction between *S. mansoni* and malaria generated an additional indirect benefit for mass praziquantel administration by reducing malaria prevalence (Figure 3).

## Discussion

We developed a co-epidemic model of malaria and *S. mansoni* transmission dynamics to take into account elevated susceptibility to malaria mediated by *S. mansoni* infection. We used this model to investigate the potential effect of malaria-*S. mansoni* interaction on the effectiveness of ACT and mass praziquantel administration for schistosomiasis for reducing malaria prevalence in co-endemic communities. Our results suggested that co-infection with schistosomiasis in low malaria transmission settings increases malaria prevalence. We further showed that in the absence of mass praziquantel administration, the interaction between *S. mansoni* and malaria may have contributed to reductions in population-level effectiveness of malaria treatment in areas of stable malaria transmission. In regions of low malaria treatment coverage, co-infection with schistosomiasis led to the greatest increase in per person malaria episodes, independent of whether malaria transmission was high or low. Our finding is consistent with epidemiological observations and laboratory studies that have suggested that presence of *S. mansoni* infections may affect the efficacy of malaria control measures, including a potential vaccine in co-endemic communities [9,32]. The interaction between the two diseases may increase the health benefits of mass praziquantel administration by generating the additional indirect benefit of reducing malaria transmission in co-endemic communities. Our results indicated that this benefit was particularly strong in low malaria transmission regions that experienced increased malaria

susceptibility due to schistosomiasis co-infection. Malaria is associated with a Th1 immune response [12], while *S. mansoni* infection is associated with a Th2 response and had been demonstrated to impair immune responses to malaria [11,13]. By reducing *S. mansoni* worm burden of infected individuals, praziquantel treatment may reduce the Th2 immune response associated with *S. mansoni* infection which may in turn result in a shift in the Th1/Th2 immune balance [14,33] towards the Th1 response that protects against malaria parasite. Though our study focused on *Plasmodium falciparum*, our results may be applicable to other forms of malaria such as *Plasmodium ovale* and *Plasmodium vivax*, which may also interact with *S. mansoni*. Prototype vaccines for both malaria [34] and *S. mansoni* intestinal schistosomiasis [35] are under development, such that the two vaccines could be co-formulated or combined [36]. Our results suggest that a co-formulated or combined vaccine may be more efficacious in reducing malaria transmission in *S. mansoni* endemic communities than a vaccine targeting malaria alone.

In addition to increasing malaria incidence, clinical studies have shown that malaria-*S. mansoni* co-infection may exacerbate clinical manifestations of both diseases [14,33,37]. These additional impacts were not factored into our model, making our predictions of the effectiveness of joint programs of ACT and praziquantel conservative. Our model also did not account for malaria age-dependent immunity [26,38]. Age-dependent malaria immunity is less important among children than adults, however, and it is even less relevant in areas of low malaria transmission [26,38,39]. We anticipate that accounting for age-dependent malaria immunity would only have a marginal quantitative effect on our results, such that the findings would remain qualitatively unchanged. Malaria and *S. mansoni* may differ in their distribution of disease intensity, prevalence, and morbidity, with some portion of the population being at higher risk than others [33]. Therefore, the magnitude of the interaction between malaria and *S. mansoni* on malaria transmission dynamics may vary from one risk group to another. Given that data on risk group specific interaction between malaria and *S. mansoni* are not available, our model only accounted for elevated malaria susceptibility from *S. mansoni* high egg output. Future studies could account for heterogeneity in malaria intensity and prevalence.

Currently, there is debate surrounding the extent and direction of the effects of malaria and co-infection with different helminth species on human hosts [7,33,40]. Apparent contradictions arising from clinical and epidemiological studies may be resolved by the possibility of species-specific effects of helminth infections on malaria [7,40,41]. As well as qualitatively different interactions for different worm burdens. For example, *Ascaris* has been associated with protection from severe malaria complications [7]. Conversely, epidemiological studies have suggested that hookworm elevates malaria prevalence [42] and exacerbates malaria-induced anaemia [22,43]. Similarly, *S. mansoni* has been shown to be associated with increased malaria incidence [6] and exacerbation of hepatosplenomegaly [37,44] and anemia [45] in individuals co-infected with malaria. It has also been reported that children with low (but not high) *S. haematobium* infection intensity co-infected with malaria have significantly lower *P. falciparum* parasitemia than worm-free individuals [46]. This observation implies that the interaction between *P. falciparum* and *S. haematobium* may have contributed to lower malaria prevalence in *S. haematobium* low risk endemic communities, but that the reverse could be the case in *S. haematobium* high risk communities. Additionally, malaria-schistosomiasis coinfection may have opposite effect on malaria transmission in *S. haematobium* compare to *S. mansoni* endemic communities. Therefore, in *S. mansoni* - *S. haematobium* co-



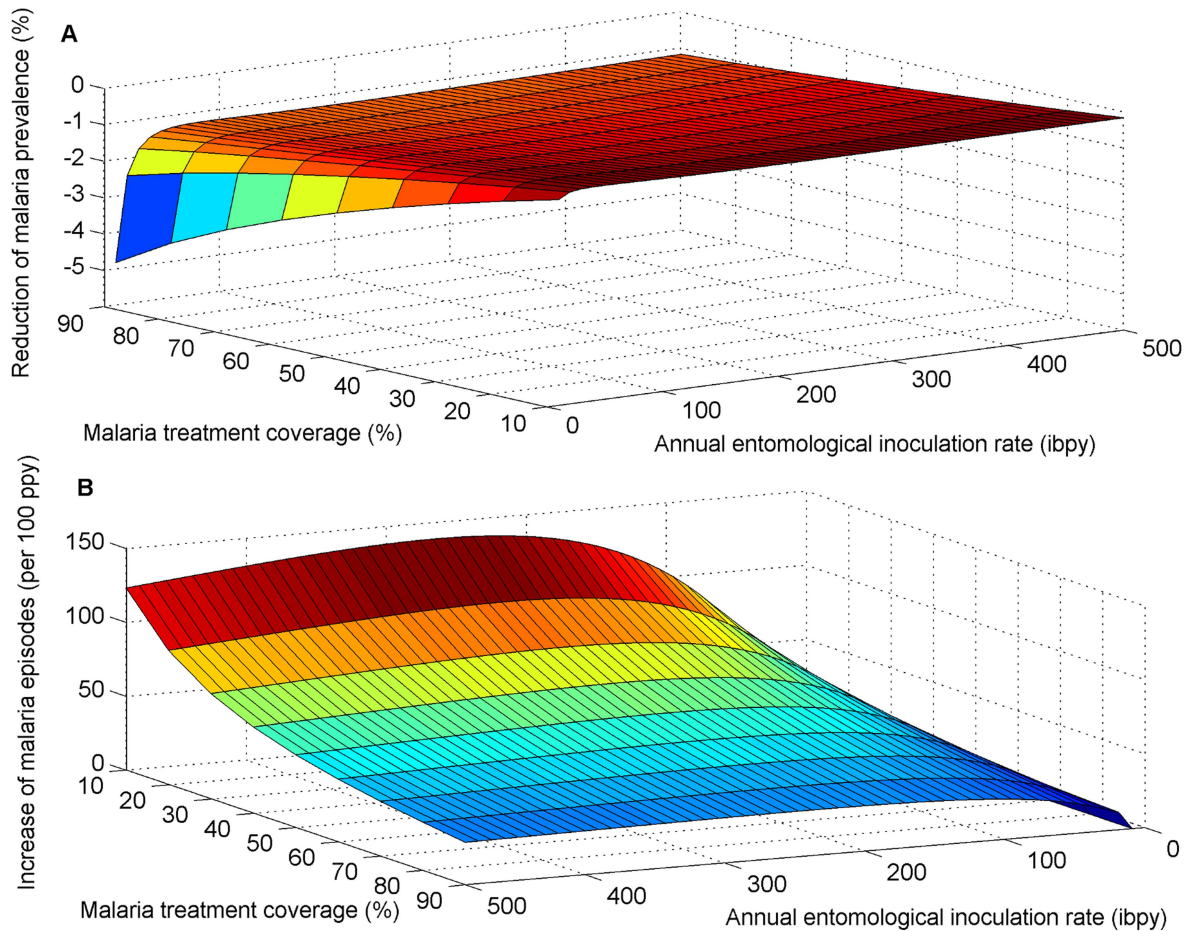

**Figure 2. The impact of the interaction between *S. mansoni* and malaria on the effectiveness of ACT for reducing malaria prevalence and symptomatic malaria episodes.** We compared (A) the proportional reduction of malaria prevalence with and without interaction and (B) the increase in symptomatic episodes of malaria due to elevated susceptibility to malaria mediated by *S. mansoni* infection. *S. mansoni* high worm burden was assumed to increase the risk of malaria infection by 85% ( $C_M = 1.85$ ), consistent with epidemiological studies [6]. doi:10.1371/journal.pntd.0003234.g002

endemic communities [47,48], schistosomiasis control may have a very complex impact on malaria transmission. Further studies are needed on the interaction of *S. mansoni* and *S. haematobium* and their potential impact on malaria transmission. Future transmission models on this topic could also account for worm mating probability and density dependent effects on egg output per worm, which can affect schistosomiasis transmission [49,50].

Polyparasite helminth infections and malaria co-infection are widespread throughout sub-Saharan Africa [22,51,52]. Therefore, studies investigating how co-infection affects the course of each infection, as well as immune responses, are fundamental to understand the potential additional benefits or perverse effects of mass drug administration and control programmes for tropical diseases. There are myriad examples of parasitic co-endemism and co-infections affecting health outcomes in sub-Saharan Africa. For example malaria and hookworm co-infections [22,53] as well as and *S. mansoni* and hookworm co-infections [54] can lead to severe anemia. A new modeling study on the interaction between lymphatic filariasis and malaria that takes into account increase in vector mortality due to lymphatic filariasis prevalence in mosquito and antagonistic Th1/Th2 immune response in co-infected host has shown that control strategies that reduce lymphatic filariasis transmission could potentially increase malaria prevalence [55]. Similarly, some studies have indicated that antimalarial bednets

may reduce transmission from lymphatic filariasis transmitted by anopheles mosquitoes [56,57]. In addition, *S. haematobium* is interacting with HIV by increasing susceptibility to HIV infection through lesions and inflammation of genital track and immunomodulation effects [58]. Two large studies in Zimbabwe and Tanzania found that women with genital schistosomiasis have a 3–4 fold increased odds of having HIV compared to women without genital schistosomiasis [59,60]. Subsequent models have shown that female genital schistosomiasis (caused by *S. haematobium*) control strategies could reduce HIV transmission [61,62], in co-endemic communities. One of the limitations of our study was that we did not examine the relationship between *S. haematobium* and malaria. Future studies could investigate the interaction between malaria and *S. haematobium*, as well as other helminths including hookworm. Such studies could also investigate low risk schistosomiasis communities where, because of the low rate of schistosomiasis reinfection, the sequential order of infection between malaria and schistosomiasis may impact the co-infections of schistosomiasis on malaria transmission.

Clinical studies have shown that ACT used in combination with praziquantel may reduce both the malaria and the schistosomiasis health burden in co-infected individuals [63–66], and that artemisinin-based therapy may have indirect benefits for reducing schistosomiasis health burden [63].

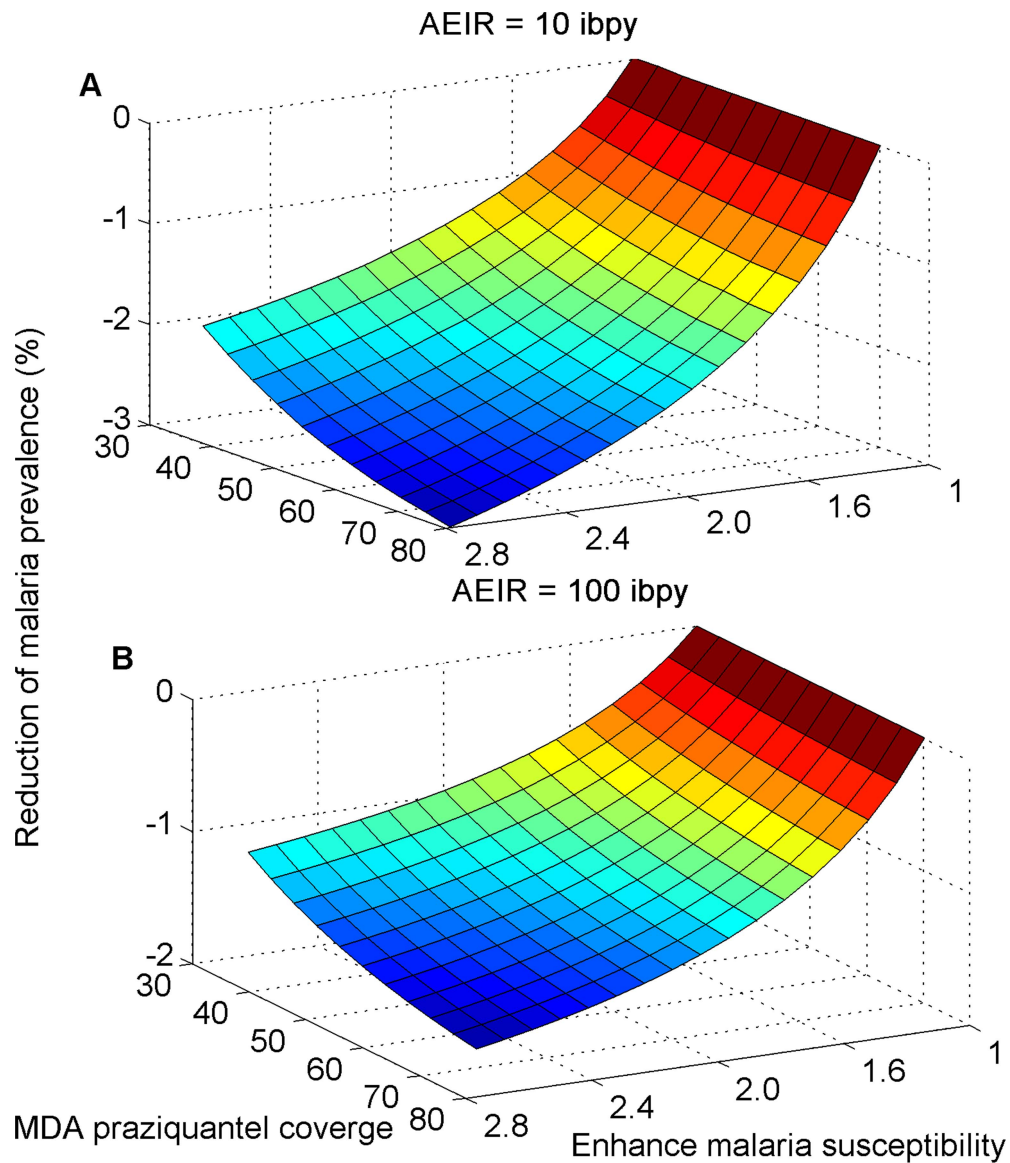

**Figure 3. The impact of mass praziquantel administration on malaria prevalence over a six-year intervention period.** The proportion of symptomatic malaria cases that received treatment was 70%. Interaction between *S. mansoni* and malaria and the effect on malaria prevalence for annual entomological inoculation rate (AEIR) equals (A) 10 infective bites per person annually and (B) 100 infective bites per person annually. doi:10.1371/journal.pntd.0003234.g003

Additional drug interaction studies may be required if ACT and praziquantel are combined for purposes of mass drug administration. In an experimental rat model of clonorchiasis, combinations of praziquantel and artemisinins produced both synergistic and antagonistic effects depending on the doses administered [67]. In humans infected with *S. japonicum* in China, it was noted that the combination of artemether and praziquantel chemotherapy did not improve treatment efficacy relative to praziquantel alone [68], while in Africa (Cote d'Ivoire) the addition of mefloquine-artesunate did not increase the efficacy of praziquantel against *S. haematobium* infection [69].

Integrating mass screening and treatment for malaria using ACT with mass drug administration of praziquantel could contribute to reducing both malaria and schistosomiasis transmission in sub-Saharan Africa. Therefore, future studies would investigate the complementary effects of ACTs and mass praziquantel administration for reducing both malaria and

schistosomiasis transmission in co-endemic communities. Immunological studies have suggested that praziquantel treatment in malaria-schistosomiasis co-endemic communities may alter the immune response of treated individuals, making them less susceptible to malaria infection [70]. However, more studies are needed to confirm this impact of praziquantel treatment.

Our results suggest that in *S. mansoni* endemic areas, mass treatment of schistosomiasis may not only have a direct benefit of reducing schistosomiasis infection, it may also reduce malaria prevalence and disease burden. This reduction of malaria prevalence was higher in areas of low malaria transmission intensity, but less pronounced in areas of high transmission intensity (AEIR greater than 100 ibpy). Additional epidemiological and clinical data on malaria-*S. mansoni* co-infection to determine influence on immune responses and duration of malaria infection are needed to fully evaluate the potential effects of *S. mansoni* and schistosomiasis control strategies on malaria.

## Supporting Information

**Figure S1** Difference in malaria prevalence attributable to *S. mansoni* at different level of malaria treatment coverage for a wide range of malaria and *Schistosoma mansoni* transmission settings. Malaria transmission settings were obtained by varying the AEIR, whereas *S. mansoni* transmission settings were obtained by sampling schistosomiasis transmission parameters over the ranges of values given in Table 1. *S. mansoni* high worm burden is assumed to increase the risk of malaria infection by 85% ( $C_M = 1.85$ ). Interaction between malaria and *S. mansoni* and the effect on (A) the difference in malaria prevalence attributable to *S. mansoni* for 70% malaria treatment coverage versus 50%

treatment coverage, and (B) the difference between 90% malaria treatment coverage versus 70% coverage. (TIF)

**Text S1** Supplementary Material for Epidemiological impact of *Schistosoma mansoni* on Malaria transmission in sub-Saharan Africa. (DOC)

## Author Contributions

Conceived and designed the experiments: MLNM PH APG. Performed the experiments: MLNM. Analyzed the data: MLNM. Contributed reagents/materials/analysis tools: LS SG. Wrote the paper: MLNM LS SG PH APG.

## References

- Sambo LG, Ki-Zerbo G, Kirigia JM (2011) Malaria control in the African Region: perceptions and viewpoints on proceedings of the Africa Leaders Malaria Alliance (ALMA). BMC Proc 5 Suppl 5: S3. Available: <http://www.pubmedcentral.nih.gov/articlerender.fcgi?artid=3254897&tool=pmcentrez&rendertype=abstract>. Accessed 24 May 2013.
- Stensgaard A-S, Utzinger J, Vounatsou P, Hürlimann E, Schur N, et al. (2011) Large-scale determinants of intestinal schistosomiasis and intermediate host snail distribution across Africa: Does climate matter? Acta Trop null. Available: <http://dx.doi.org/10.1016/j.actatropica.2011.11.010>. Accessed 28 June 2013.
- Hürlimann E, Schur N, Boutsika K, Stensgaard A-S, Laserna de Himpl M, et al. (2011) Toward an open-access global database for mapping, control, and surveillance of neglected tropical diseases. PLoS Negl Trop Dis 5: e1404. Available: <http://dx.plos.org/10.1371/journal.pntd.0001404>. Accessed 30 June 2013.
- Van der Werf MJ, de Vlas SJ, Brooker S, Looman CWN, Nagelkerke NJD, et al. (2003) Quantification of clinical morbidity associated with schistosome infection in sub-Saharan Africa. Acta Trop 86: 125–139. Available: <http://www.ncbi.nlm.nih.gov/pubmed/12745133>. Accessed 12 November 2012.
- Hotez PJ, Molyneux DH, Fenwick A, Ottesen E, Ehrlich Sachs S, et al. (2006) Incorporating a rapid-impact package for neglected tropical diseases with programs for HIV/AIDS, tuberculosis, and malaria. PLoS Med 3: e102. Available: <http://dx.plos.org/10.1371/journal.pmed.0030102>. Accessed 3 June 2013.
- Sokhna C, Le Hesran J-Y, Mbaye PA, Akiana J, Camara P, et al. (2004) Increase of malaria attacks among children presenting concomitant infection by *Schistosoma mansoni* in Senegal. Malar J 3: 43. Available: <http://www.pubmedcentral.nih.gov/articlerender.fcgi?artid=538284&tool=pmcentrez&rendertype=abstract>. Accessed 30 May 2013.
- Nacher M (2011) Interactions between worms and malaria: good worms or bad worms? Malar J 10: 259. Available: <http://www.pubmedcentral.nih.gov/articlerender.fcgi?artid=3192711&tool=pmcentrez&rendertype=abstract>. Accessed 15 June 2013.
- Sangweme DT, Midzi N, Zinyowera-Mutapuri S, Mdluluza T, Diener-West M, et al. (2010) Impact of schistosome infection on *Plasmodium falciparum* Malariometric indices and immune correlates in school age children in Burma Valley, Zimbabwe. PLoS Negl Trop Dis 4: e882. Available: <http://dx.plos.org/10.1371/journal.pntd.0000882>. Accessed 29 May 2013.
- Druilhe P, Tall A, Sokhna C (2005) Worms can worsen malaria: towards a new means to roll back malaria? Trends Parasitol 21: 359–362. Available: <http://www.ncbi.nlm.nih.gov/pubmed/15967721>. Accessed 24 May 2013.
- Hartgers FC, Obeng BB, Kruijze YCM, Dijkhuis A, McCall M, et al. (2009) Responses to malarial antigens are altered in helminth-infected children. J Infect Dis 199: 1528–1535. Available: <http://jid.oxfordjournals.org/content/199/10/1528.long>. Accessed 26 May 2013.
- Helmbj H, Kullberg M, Troye-Blomberg M (1998) Altered immune responses in mice with concomitant *Schistosoma mansoni* and *Plasmodium chabaudi* infections. Infect Immun 66: 5167–5174. Available: <http://www.pubmedcentral.nih.gov/articlerender.fcgi?artid=108644&tool=pmcentrez&rendertype=abstract>. Accessed 5 July 2013.
- Su Z, Segura M, Morgan K, Loredó-Osti JC, Stevenson MM (2005) Impairment of protective immunity to blood-stage malaria by concurrent nematode infection. Infect Immun 73: 3531–3539. Available: <http://www.pubmedcentral.nih.gov/articlerender.fcgi?artid=1111846&tool=pmcentrez&rendertype=abstract>. Accessed 5 July 2013.
- Maizels RM, Pearce EJ, Artis D, Yazdanbakhsh M, Wynn TA (2009) Regulation of pathogenesis and immunity in helminth infections. J Exp Med 206: 2059–2066. Available: <http://jem.rupress.org/content/206/10/2059.full>. Accessed 4 June 2013.
- Osada Y, Kanazawa T (2011) Schistosome: its benefit and harm in patients suffering from concomitant diseases. J Biomed Biotechnol 2011: 264173. Available: <http://europaepmc.org/articles/PMC3216407>. Accessed 5 July 2013.
- Ceesay SJ, Casals-Pascual C, Erskine J, Anya SE, Duah NO, et al. (2008) Changes in malaria indices between 1999 and 2007 in The Gambia: a retrospective analysis. Lancet 372: 1545–1554. Available: <http://www.pubmedcentral.nih.gov/articlerender.fcgi?artid=2607025&tool=pmcentrez&rendertype=abstract>. Accessed 21 May 2013.
- Barnes KL, Chanda P, Ab Bamabas G (2009) Impact of the large-scale deployment of artemether/lumefantrine on the malaria disease burden in Africa: case studies of South Africa, Zambia and Ethiopia. Malar J 8 Suppl 1: S8. Available: <http://www.pubmedcentral.nih.gov/articlerender.fcgi?artid=2760243&tool=pmcentrez&rendertype=abstract>. Accessed 14 June 2013.
- Okell LC, Drakeley CJ, Ghani AC, Bousema T, Sutherland CJ (2008) Reduction of transmission from malaria patients by artemisinin combination therapies: a pooled analysis of six randomized trials. Malar J 7: 125. Available: <http://www.pubmedcentral.nih.gov/articlerender.fcgi?artid=2491628&tool=pmcentrez&rendertype=abstract>. Accessed 30 May 2013.
- Okell LC, Drakeley CJ, Bousema T, Whitty CJM, Ghani AC (2008) Modelling the impact of artemisinin combination therapy and long-acting treatments on malaria transmission intensity. PLoS Med 5: e226; discussion e226. Available: <http://dx.plos.org/10.1371/journal.pmed.0050226>. Accessed 30 May 2013.
- King CH, Dickman K, Tisch DJ (2005) Reassessment of the cost of chronic helminth infection: a meta-analysis of disability-related outcomes in endemic schistosomiasis. Lancet 365: 1561–1569. Available: <http://www.ncbi.nlm.nih.gov/pubmed/15866310>. Accessed 13 November 2012.
- WHO (2011) Helminth control in school-age children. A guide for managers of control programmes. Preventive Chemotherapy and Transmission Control (PCT), Department of Control of Neglected Tropical Diseases (NTD). Geneva. Available: [http://whqlibdoc.who.int/publications/2011/9789241548267\\_eng.pdf](http://whqlibdoc.who.int/publications/2011/9789241548267_eng.pdf).
- Fenwick A (2012) The global burden of neglected tropical diseases. Public Health 126: 233–236. Available: <http://www.ncbi.nlm.nih.gov/pubmed/22325616>. Accessed 11 November 2012.
- Brooker S, Akhwale W, Pullan R, Estambale B, Clarke SE, et al. (2007) Epidemiology of plasmodium-helminth co-infection in Africa: populations at risk, potential impact on anemia, and prospects for combining control. Am J Trop Med Hyg 77: 88–98. Available: <http://www.pubmedcentral.nih.gov/articlerender.fcgi?artid=2637949&tool=pmcentrez&rendertype=abstract>. Accessed 19 June 2013.
- Friis H, Mwaniki D, Omondi B, Munui E, Magnussen P, et al. (1997) Serum retinol concentrations and *Schistosoma mansoni*, intestinal helminths, and malarial parasitemia: a cross-sectional study in Kenyan preschool and primary school children. Am J Clin Nutr 66: 665–671. Available: <http://ajcn.nutrition.org/content/66/3/665.short>. Accessed 21 April 2014.
- Naus CWA, Jones FM, Satti MZ, Joseph S, Riley EM, et al. (2003) Serological responses among individuals in areas where both schistosomiasis and malaria are endemic: cross-reactivity between *Schistosoma mansoni* and *Plasmodium falciparum*. J Infect Dis 187: 1272–1282. Available: <http://jid.oxfordjournals.org/content/187/8/1272.short>. Accessed 21 April 2014.
- Booth M, Vennervald BJ, Butterworth AE, Kariuki HC, Amaganga C, et al. (2004) Exposure to malaria affects the regression of hepatosplenomegaly after treatment for *Schistosoma mansoni* infection in Kenyan children. BMC Med 2: 36. Available: <http://www.biomedcentral.com/1741-7015/2/36>. Accessed 21 April 2014.
- Griffin JT, Hollingsworth TD, Okell LC, Churcher TS, White M, et al. (2010) Reducing *Plasmodium falciparum* malaria transmission in Africa: a model-based evaluation of intervention strategies. PLoS Med 7: 17. Available: <http://dx.plos.org/10.1371/journal.pmed.1000324>. Accessed 24 May 2013.
- Riley S, Carabin H, Marshall C, Olveda R, Willingham AL, et al. (2005) Estimating and modeling the dynamics of the intensity of infection with *Schistosoma japonicum* in villagers of Leyte, Philippines. Part II: Intensity-specific transmission of *S. japonicum*. The schistosomiasis transmission and ecology project. Am J Trop Med Hyg 72: 754–761. Available: <http://www.ncbi.nlm.nih.gov/pubmed/15964960>. Accessed 6 July 2013.
- Gurarie D, King CH, Wang X (2010) A new approach to modelling schistosomiasis transmission based on stratified worm burden. Parasitology 137: 1951–1965. doi:10.1017/S0031182010000867.

29. King CH, Olbrych SK, Soon M, Singer ME, Carter J, et al. (2011) Utility of repeated praziquantel dosing in the treatment of schistosomiasis in high-risk communities in Africa: a systematic review. *PLoS Negl Trop Dis* 5: e1321. Available: <http://www.pubmedcentral.nih.gov/articlerender.fcgi?artid=317674&tool=pmcentrez&rendertype=abstract>. Accessed 4 June 2013.
30. Tukahebwa EM, Vennervald BJ, Nuwaha F, Kabatereine NB, Magnussen P (2013) Comparative efficacy of one versus two doses of praziquantel on cure rate of *Schistosoma mansoni* infection and re-infection in Mayuge District, Uganda. *Trans R Soc Trop Med Hyg* 107: 397–404. Available: <http://www.ncbi.nlm.nih.gov/pubmed/23596262>. Accessed 6 July 2013.
31. Hay SI, Guerra CA, Tatem AJ, Atkinson PM, Snow RW (2005) Urbanization, malaria transmission and disease burden in Africa. *Nat Rev Microbiol* 3: 81–90. Available: <http://www.pubmedcentral.nih.gov/articlerender.fcgi?artid=3130901&tool=pmcentrez&rendertype=abstract>. Accessed 24 March 2014.
32. Nacher M (2001) Malaria vaccine trials in a wormy world. *Trends Parasitol* 17: 563–565. Available: <http://www.ncbi.nlm.nih.gov/pubmed/11756019>. Accessed 10 July 2013.
33. Wilson S, Dunne DW (2012) Advances in our understanding of the epidemiology of *Plasmodium* and schistosome infection: informing coinfection studies. *Curr Opin HIV AIDS* 7: 225–230. Available: <http://www.ncbi.nlm.nih.gov/pubmed/22327411>. Accessed 11 July 2013.
34. Olotu A, Fegan G, Wambua J, Nyangweso G, Awuondo KO, et al. (2013) Four-year efficacy of RTS,S/AS01E and its interaction with malaria exposure. *N Engl J Med* 368: 1111–1120. Available: <http://www.ncbi.nlm.nih.gov/pubmed/23514288>. Accessed 13 November 2013.
35. Curti E, Kwityn C, Zhan B, Gillespie P, Brelsford J, et al. (2013) Expression at a 20L scale and purification of the extracellular domain of the *Schistosoma mansoni* TSP-2 recombinant protein: A vaccine candidate for human intestinal schistosomiasis. *Hum Vaccin Immunother* 9. Available: <http://www.ncbi.nlm.nih.gov/pubmed/23899507>. Accessed 18 November 2013.
36. Hotez PJ, Bethony JM, Diemert DJ, Pearson M, Loukas A (2010) Developing vaccines to combat hookworm infection and intestinal schistosomiasis. *Nat Rev Microbiol* 8: 814–826. Available: <http://dx.doi.org/10.1038/nrmicro2438>. Accessed 7 November 2013.
37. Wilson S, Vennervald BJ, Kadzo H, Ileri E, Amaganga C, et al. (2007) Hepatosplenomegaly in Kenyan schoolchildren: exacerbation by concurrent chronic exposure to malaria and *Schistosoma mansoni* infection. *Trop Med Int Health* 12: 1442–1449. Available: <http://www.ncbi.nlm.nih.gov/pubmed/18076550>. Accessed 4 July 2013.
38. Filipe JAN, Riley EM, Drakeley CJ, Sutherland CJ, Ghani AC (2007) Determination of the processes driving the acquisition of immunity to malaria using a mathematical transmission model. *PLoS Comput Biol* 3: e255. Available: <http://www.pubmedcentral.nih.gov/articlerender.fcgi?artid=2230683&tool=pmcentrez&rendertype=abstract>. Accessed 24 May 2013.
39. Doolan DL, Dobaño C, Baird JK (2009) Acquired immunity to malaria. *Clin Microbiol Rev* 22: 13–36. Table of Contents. Available: <http://www.pubmedcentral.nih.gov/articlerender.fcgi?artid=2620631&tool=pmcentrez&rendertype=abstract>. Accessed 24 May 2013.
40. Adegnik AA, Kremsner PG (2012) Epidemiology of malaria and helminth interaction: a review from 2001 to 2011. *Curr Opin HIV AIDS* 7: 221–224. Available: <http://www.ncbi.nlm.nih.gov/pubmed/22418449>. Accessed 11 July 2013.
41. Graham AL (2008) Ecological rules governing helminth-microparasite coinfection. *Proc Natl Acad Sci U S A* 105: 566–570. Available: <http://www.pnas.org/content/105/2/566.short>. Accessed 29 May 2013.
42. Boel M, Carrara VI, Rijken M, Proux S, Nacher M, et al. (2010) Complex interactions between soil-transmitted helminths and malaria in pregnant women on the Thai-Burmese border. *PLoS Negl Trop Dis* 4: e887. Available: <http://dx.plos.org/10.1371/journal.pntd.0000887>. Accessed 12 July 2013.
43. Dreyfuss ML, Stoltzfus RJ, Shrestha JB, Pradhan EK, LeClerq SC, et al. (2000) Hookworms, malaria and vitamin A deficiency contribute to anemia and iron deficiency among pregnant women in the plains of Nepal. *J Nutr* 130: 2527–2536. Available: <http://www.ncbi.nlm.nih.gov/pubmed/11015485>. Accessed 12 July 2013.
44. Booth M, Vennervald BJ, Kenty L, Butterworth AE, Kariuki HC, et al. (2004) Micro-geographical variation in exposure to *Schistosoma mansoni* and malaria, and exacerbation of splenomegaly in Kenyan school-aged children. *BMC Infect Dis* 4: 13. Available: <http://www.biomedcentral.com/1471-2334/4/13>. Accessed 23 April 2014.
45. Ajanga A, Lwambo NJS, Blair L, Nyandindi U, Fenwick A, et al. (2006) *Schistosoma mansoni* in pregnancy and associations with anaemia in northwest Tanzania. *Trans R Soc Trop Med Hyg* 100: 59–63. Available: <http://trstmh.oxfordjournals.org/content/100/1/59.abstract>. Accessed 5 April 2014.
46. Briand V, Watier L, LE Hesran J-Y, Garcia A, Cot M (2005) Coinfection with *Plasmodium falciparum* and *Schistosoma haematobium*: protective effect of schistosomiasis on malaria in Senegalese children? *Am J Trop Med Hyg* 72: 702–707. Available: <http://www.ncbi.nlm.nih.gov/pubmed/15964953>. Accessed 12 July 2013.
47. Sang HC, Muchiri G, Ombok M, Odieri MR, Mwinzi PN (2014) *Schistosoma haematobium* hotspots in south Nyanza, western Kenya: prevalence, distribution and co-endemicity with *Schistosoma mansoni* and soil-transmitted helminths. *Parasit Vectors* 7: 125. Available: <http://www.parasitesandvectors.com/content/7/1/125>. Accessed 23 April 2014.
48. McCullough FS (1972) The distribution of *Schistosoma mansoni* and *S. haematobium* in East Africa. *Trop Geogr Med* 24: 199–207. Available: <http://www.ncbi.nlm.nih.gov/pubmed/4673849>. Accessed 23 April 2014.
49. Gryseels B, Polman K, Clerinx J, Kestens L (2006) Human schistosomiasis. *Lancet* 368: 1106–1118. Available: <http://www.sciencedirect.com/science/article/pii/S0140673606694403>. Accessed 1 May 2014.
50. Spear RC (2012) Internal versus external determinants of *Schistosoma japonicum* transmission in irrigated agricultural villages. *J R Soc Interface* 9: 272–282. Available: <http://rsif.royalsocietypublishing.org/content/9/67/272.full>. Accessed 5 May 2014.
51. Mupfasoni D, Karibushi B, Koukounari A, Ruberanziza E, Kaberuka T, et al. (2009) Poly-parasite helminth infections and their association to anaemia and undernutrition in Northern Rwanda. *PLoS Negl Trop Dis* 3: e517. Available: <http://dx.plos.org/10.1371/journal.pntd.0000517>. Accessed 12 July 2013.
52. Nguhiu PN, Kariuki HC, Magambo JK, Kimani G, Mwatha JK, et al. (2009) Intestinal poly-parasitism in a rural Kenyan community. *East Afr Med J* 86: 272–278. Available: <http://www.ncbi.nlm.nih.gov/pubmed/20358789>. Accessed 12 July 2013.
53. Brooker S, Clements ACA, Hotez PJ, Hay SI, Tatem AJ, et al. (2006) The co-distribution of *Plasmodium falciparum* and hookworm among African schoolchildren. *Malar J* 5: 99. Available: <http://www.malariajournal.com/content/5/1/99>. Accessed 25 April 2014.
54. Raso G, Vounatsou P, Singer BH, N'Goran EK, Tanner M, et al. (2006) An integrated approach for risk profiling and spatial prediction of *Schistosoma mansoni*-hookworm coinfection. *Proc Natl Acad Sci U S A* 103: 6934–6939. Available: <http://www.pnas.org/content/103/18/6934>. Accessed 25 April 2014.
55. Slater HC, Gambhir M, Parham PE, Michael E (2013) Modelling co-infection with malaria and lymphatic filariasis. *PLoS Comput Biol* 9: e1003096. Available: <http://dx.plos.org/10.1371/journal.pcbi.1003096>. Accessed 2 July 2013.
56. Manga L (2002) Vector-control synergies, between “roll back malaria” and the Global Programme to Eliminate Lymphatic Filariasis, in the African region. *Ann Trop Med Parasitol* 96 Suppl 2: S129–32. Available: <http://www.ncbi.nlm.nih.gov/pubmed/12630402>. Accessed 25 April 2014.
57. Prasittisuk C (2002) Vector-control synergies, between “roll back malaria” and the Global Programme to Eliminate Lymphatic Filariasis, in South-east Asia. *Ann Trop Med Parasitol* 96 Suppl 2: S133–7. Available: <http://www.ncbi.nlm.nih.gov/pubmed/12630409>. Accessed 25 April 2014.
58. Mbabazi PS, Andan O, Fitzgerald DW, Chitsulo L, Engels D, et al. (2011) Examining the relationship between urogenital schistosomiasis and HIV infection. *PLoS Negl Trop Dis* 5: e1396. Available: <http://dx.plos.org/10.1371/journal.pntd.0001396>. Accessed 1 November 2012.
59. Kjetland EF, Ndhlovu PD, Gomo E, Mduluzi T, Midzi N, et al. (2006) Association between genital schistosomiasis and HIV in rural Zimbabwean women. *AIDS* 20: 593–600. Available: <http://www.ncbi.nlm.nih.gov/pubmed/16470124>. Accessed 12 November 2012.
60. Downs JA, van Dam GJ, Changalucha JM, Corstjens PLAM, Peck RN, et al. (2012) Association of Schistosomiasis and HIV infection in Tanzania. *Am J Trop Med Hyg* 87: 868–873. Available: <http://www.ncbi.nlm.nih.gov/pubmed/23033399>. Accessed 25 September 2013.
61. Ndeffo Mbah ML, Kjetland EF, Atkins KE, Poolman EM, Orenstein EW, et al. (2013) Cost-effectiveness of a community-based intervention for reducing the transmission of *Schistosoma haematobium* and HIV in Africa. *Proc Natl Acad Sci U S A* 110: 7952–7957. Available: <http://www.pnas.org/content/110/19/7952.abstract>. Accessed 24 May 2013.
62. Ndeffo Mbah ML, Poolman EM, Atkins KE, Orenstein EW, Meyers LA, et al. (2013) Potential Cost-Effectiveness of Schistosomiasis Treatment for Reducing HIV Transmission in Africa - The Case of Zimbabwean Women. *PLoS Negl Trop Dis* 7: e2346. Available: <http://dx.plos.org/10.1371/journal.pntd.0002346>. Accessed 16 September 2013.
63. Utzinger J, N'Goran EK, N'Dri A, Lengeler C, Shuhua X, et al. (2000) Oral artemether for prevention of *Schistosoma mansoni* infection: randomised controlled trial. *Lancet* 355: 1320–1325. Available: <http://www.sciencedirect.com/science/article/pii/S0140673600021140>. Accessed 4 December 2013.
64. Liu R, Dong H-F, Guo Y, Zhao Q-P, Jiang M-S (2011) Efficacy of praziquantel and artemisinin derivatives for the treatment and prevention of human schistosomiasis: a systematic review and meta-analysis. *Parasit Vectors* 4: 201. Available: <http://www.pubmedcentral.nih.gov/articlerender.fcgi?artid=3207908&tool=pmcentrez&rendertype=abstract>. Accessed 10 April 2014.
65. Pérez del Villar L, Burguillo FJ, López-Abán J, Muro A (2012) Systematic review and meta-analysis of artemisinin based therapies for the treatment and prevention of schistosomiasis. *PLoS One* 7: e45867. Available: <http://www.plosone.org/article/info%3Adoi%2F10.1371%2Fjournal.pone.0045867#pone-0045867-g007>. Accessed 21 April 2014.
66. Obonyo CO, Muok EMO, Mwinzi PNM (2010) Efficacy of artesunate with sulfalene plus pyrimethamine versus praziquantel for treatment of *Schistosoma mansoni* in Kenyan children: an open-label randomised controlled trial. *Lancet Infect Dis* 10: 603–611. Available: <http://www.sciencedirect.com/science/article/pii/S1473309910701614>. Accessed 22 April 2014.
67. Keiser J, Xiao S-H, Smith T, Utzinger J (2009) Combination chemotherapy against *Clonorchis sinensis*: experiments with artemether, artesunate, OZ78, praziquantel, and tribendimidine in a rat model. *Antimicrobial Agents and Chemotherapy* 53: 3770–3776. Available: <http://www.pnas.org/content/110/19/7952.abstract>. Accessed 14 August 2014.



68. Hou X-Y, McManus D, Gray D, Balen J, Luo X-S, et al. (2008) A randomized, double-blind, placebo-controlled trial of safety and efficacy of combined praziquantel and artemether treatment for acute *Schistosomiasis japonica* in China. *Bulletin of the World Health Organization* 86: 788–795. Available: <http://www.plosntds.org/article/info%3Adoi%2F10.1371%2Fjournal.pntd.0002975>. Accessed 14 August 2014.
69. Keiser J, Silué K, Adiossan L, N'Guessan N, Monsan N, et al. (2014) Praziquantel, Mefloquine-Praziquantel, and Mefloquine-Artesunate-Praziquantel against *Schistosoma haematobium*: A Randomized, Exploratory, Open-Label Trial. *PLoS Neglected Tropical Diseases* 8: e2975. Available: <http://www.plosntds.org/article/info%3Adoi%2F10.1371%2Fjournal.pntd.0002975>. Accessed 14 August 2014.
70. Mutapi F, Roussilhon C, Mduluzi T, Druilhe P (2007) Anti-malaria humoral responses in children exposed to *Plasmodium falciparum* and *Schistosoma haematobium*. *Mem Inst Oswaldo Cruz* 102: 405–409. Available: <http://www.ncbi.nlm.nih.gov/pubmed/17568947>. Accessed 21 April 2014.
71. Gu W, Mbogo CM, Githure JI, Regens JL, Killeen GF, et al. (2003) Low recovery rates stabilize malaria endemicity in areas of low transmission in coastal Kenya. *Acta Trop* 86: 71–81. Available: <http://www.ncbi.nlm.nih.gov/pubmed/12711106>. Accessed 6 July 2013.
72. Le Port A, Cot M, Etard J-F, Gaye O, Migot-Nabias F, et al. (2008) Relation between *Plasmodium falciparum* asymptomatic infection and malaria attacks in a cohort of Senegalese children. *Malar J* 7: 193. Available: <http://www.pubmedcentral.nih.gov/articlerender.fcgi?artid=2567330&tool=pmcentrez&rendertype=abstract>. Accessed 9 August 2013.
73. Miller MJ (1958) Observations on the natural history of malaria in the semi-resistant West African. *Trans R Soc Trop Med Hyg* 52: 152–168. Available: <http://www.ncbi.nlm.nih.gov/pubmed/13543904>. Accessed 2 July 2013.
74. Falk N, Maire N, Sama W, Owusu-Agyei S, Smith T, et al. (2006) Comparison of PCR-RFLP and Genescan-based genotyping for analyzing infection dynamics of *Plasmodium falciparum*. *Am J Trop Med Hyg* 74: 944–950. Available: <http://www.ncbi.nlm.nih.gov/pubmed/16760501>. Accessed 6 July 2013.
75. Zwang J, Ashley EA, Karema C, D'Alessandro U, Smithuis F, et al. (2009) Safety and efficacy of dihydroartemisinin-piperazine in falciparum malaria: a prospective multi-centre individual patient data analysis. *PLoS One* 4: e6358. Available: <http://dx.plos.org/10.1371/journal.pone.0006358>. Accessed 29 May 2013.
76. Watkins WM, Mberu EK, Winstanley PA, Plowe C V (1997) The efficacy of antifolate antimalarial combinations in Africa: a predictive model based on pharmacodynamic and pharmacokinetic analyses. *Parasitol Today* 13: 459–464. Available: <http://www.ncbi.nlm.nih.gov/pubmed/15275132>. Accessed 6 July 2013.
77. Ruebush TK, Kern MK, Campbell CC, Oloo AJ (1995) Self-treatment of malaria in a rural area of western Kenya. *Bull World Health Organ* 73: 229–236. Available: <http://www.pubmedcentral.nih.gov/articlerender.fcgi?artid=24186763&tool=pmcentrez&rendertype=abstract>. Accessed 5 December 2013.
78. Espino F, Manderson L (2000) Treatment seeking for malaria in Morong, Bataan, The Philippines. *Soc Sci Med* 50: 1309–1316. Available: <http://www.sciencedirect.com/science/article/pii/S0277953699003792>. Accessed 8 August 2014.
79. Ross A, Killeen G, Smith T (2006) Relationships between host infectivity to mosquitoes and asexual parasite density in *Plasmodium falciparum*. *Am J Trop Med Hyg* 75: 32–37. Available: <http://www.ncbi.nlm.nih.gov/pubmed/16931813>. Accessed 6 July 2013.
80. Mangal TD, Paterson S, Fenton A (2008) Predicting the impact of long-term temperature changes on the epidemiology and control of schistosomiasis: a mechanistic model. *PLoS One* 3: e1438. Available: <http://dx.plos.org/10.1371/journal.pone.0001438>. Accessed 8 January 2013.
81. Spear RC, Hubbard A, Liang S, Seto E (2002) Disease transmission models for public health decision making: toward an approach for designing intervention strategies for *Schistosomiasis japonica*. *Environ Health Perspect* 110: 907–915. Available: <http://www.pubmedcentral.nih.gov/articlerender.fcgi?artid=1240991&tool=pmcentrez&rendertype=abstract>. Accessed 8 January 2013.
82. Hallett TB, Gregson S, Mugurungi O, Gonese E, Garnett GP (2009) Assessing evidence for behaviour change affecting the course of HIV epidemics: a new mathematical modelling approach and application to data from Zimbabwe. *Epidemics* 1: 108–117. Available: <http://www.ncbi.nlm.nih.gov/pubmed/21352758>. Accessed 4 December 2012.
83. Odiere MR, Rawago FO, Ombok M, Secor WE, Karanja DMS, et al. (2012) High prevalence of schistosomiasis in Mbita and its adjacent islands of Lake Victoria, western Kenya. *Parasit Vectors* 5: 278. Available: <http://www.pubmedcentral.nih.gov/articlerender.fcgi?artid=3523971&tool=pmcentrez&rendertype=abstract>. Accessed 29 May 2013.
84. Zhang Y, Koukounari A, Kabatereine N, Fleming F, Kazibwe F, et al. (2007) Parasitological impact of 2-year preventive chemotherapy on schistosomiasis and soil-transmitted helminthiasis in Uganda. *BMC Med* 5: 27. Available: <http://www.pubmedcentral.nih.gov/articlerender.fcgi?artid=2014753&tool=pmcentrez&rendertype=abstract>. Accessed 6 July 2013.
